# Supplementary material for: Altering mammalian transcription networking with ADAADi: An inhibitor of ATP-dependent chromatin remodeling
Source: PubMed Central journal article supplement (PMC8128233; doi:10.1371/journal.pone.0251354), 2021-05-17

# S1 Fig

A.

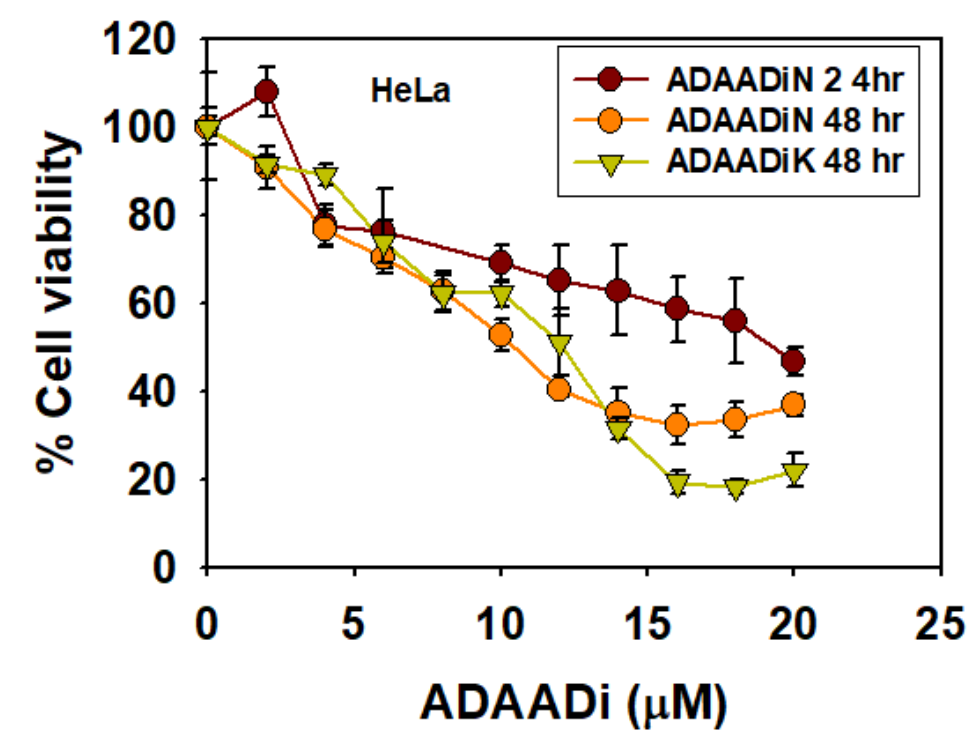

B.

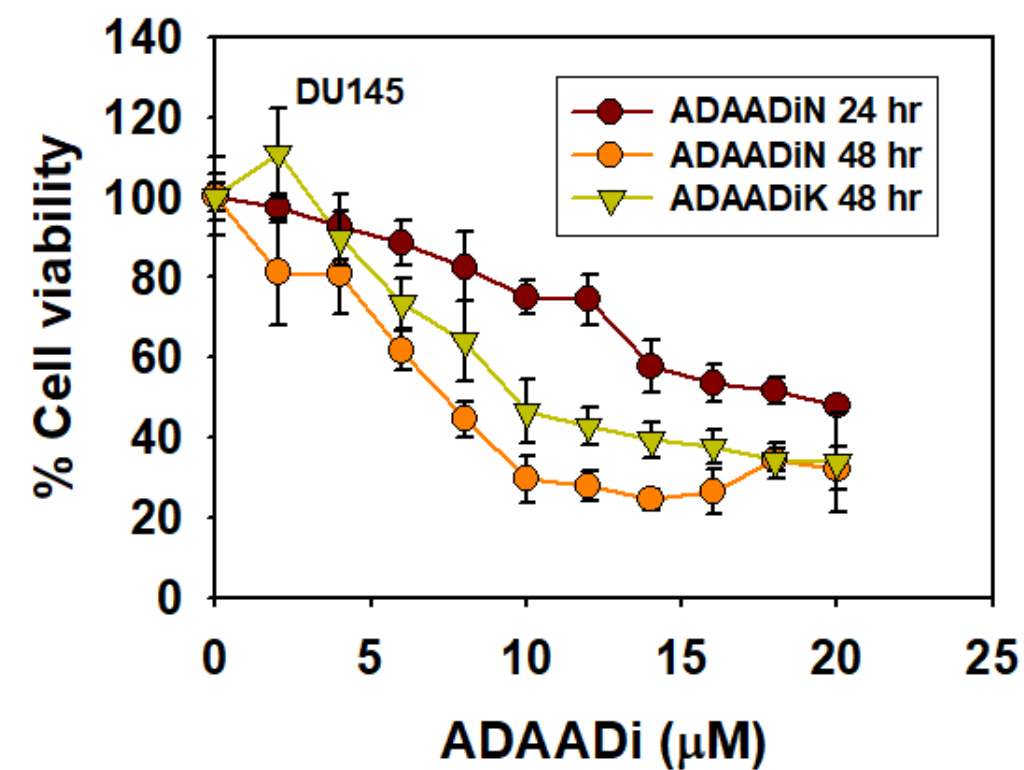

C.

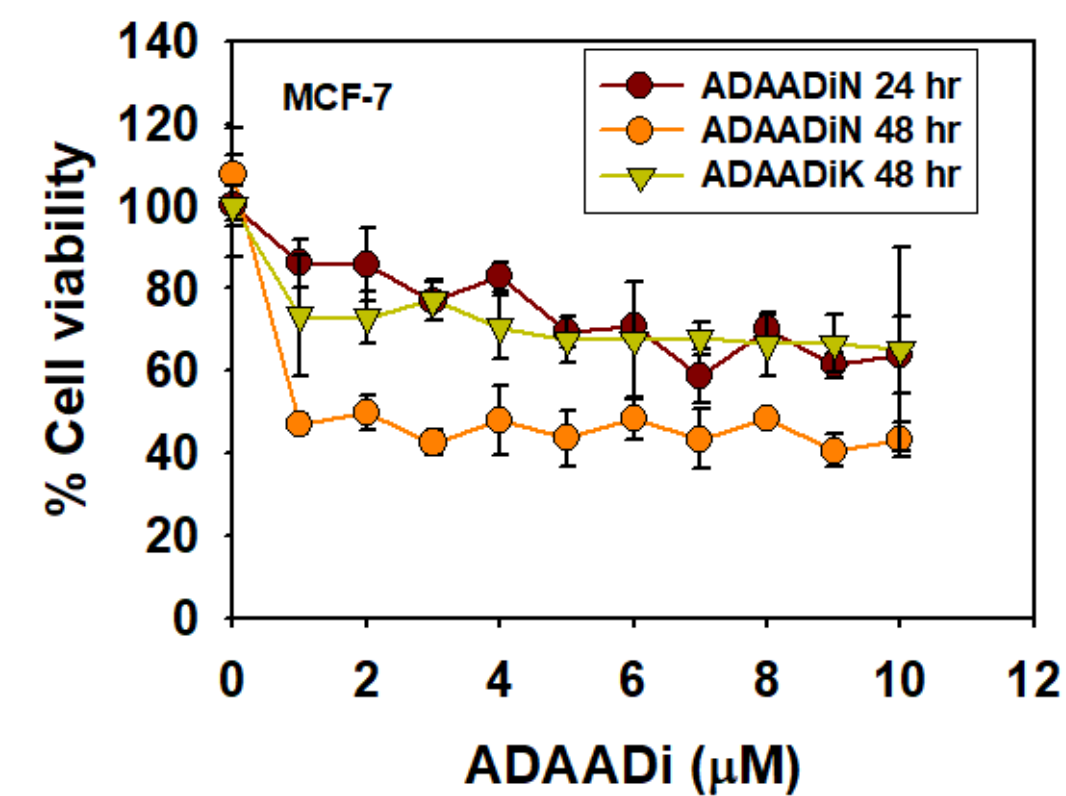

D.

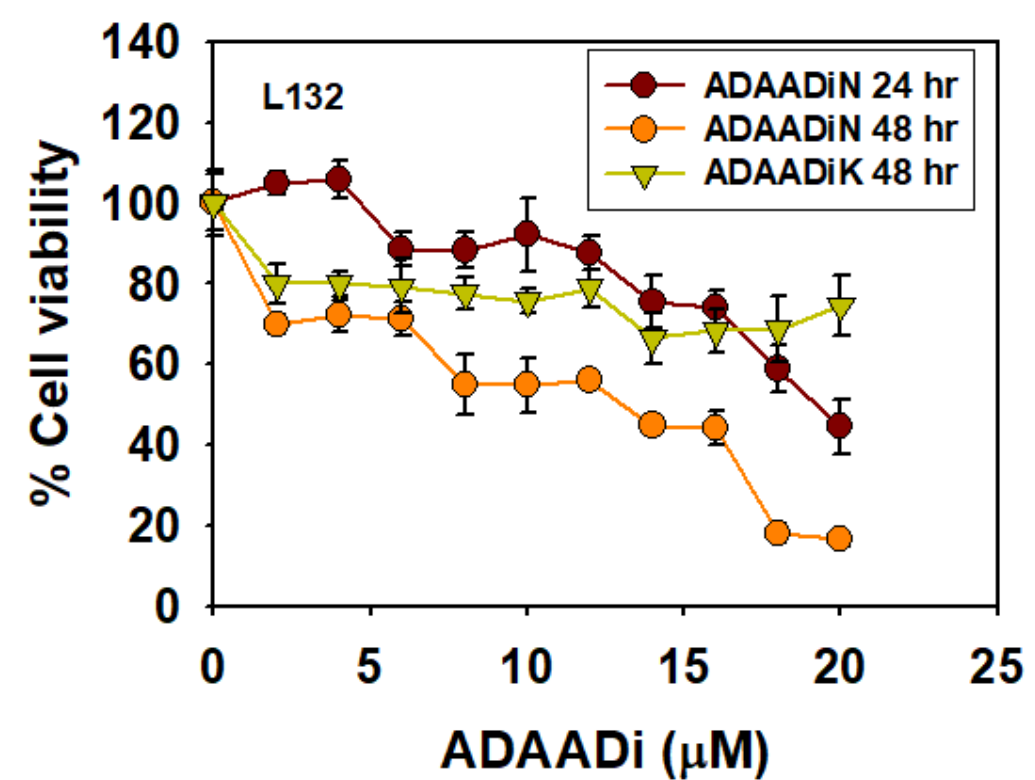

E.

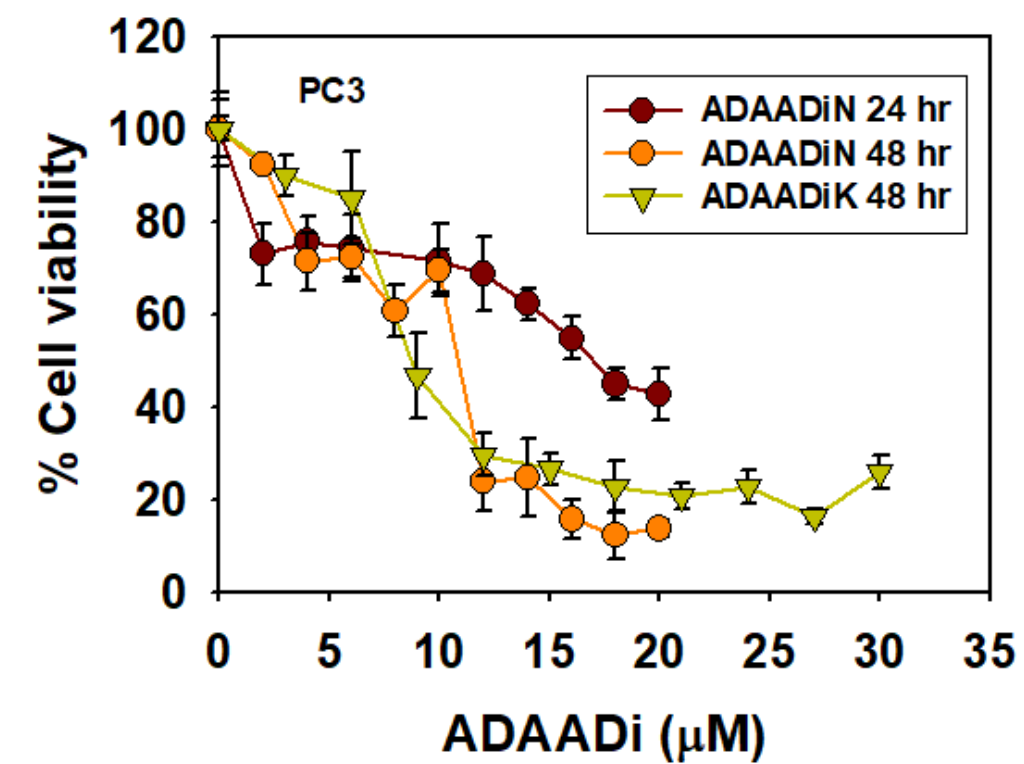

F.

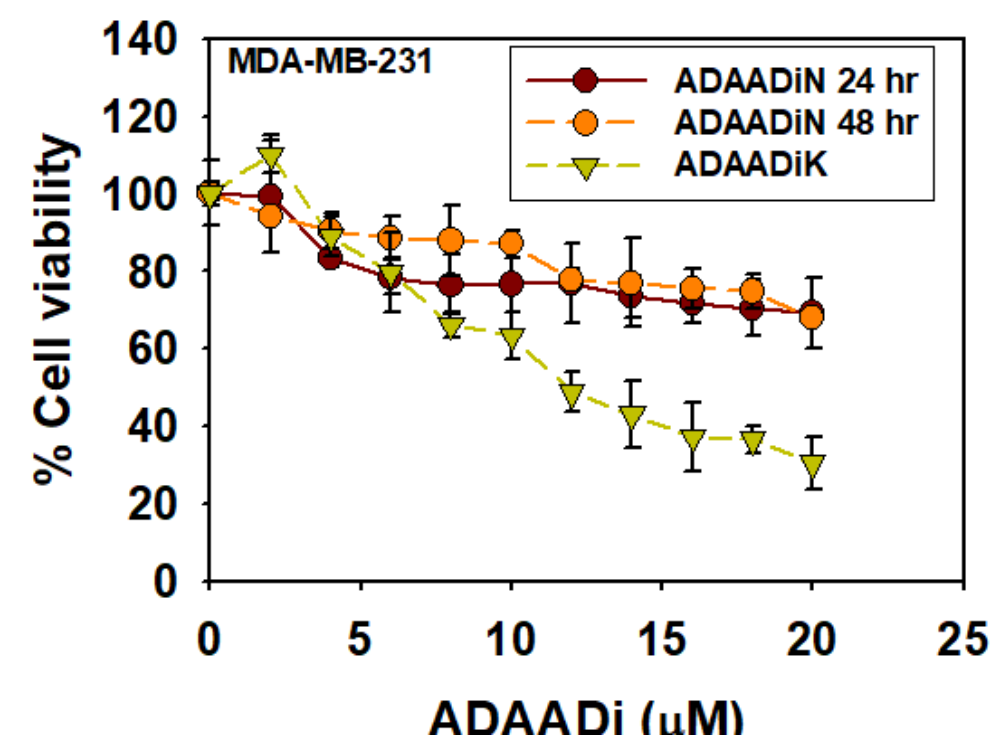

G.

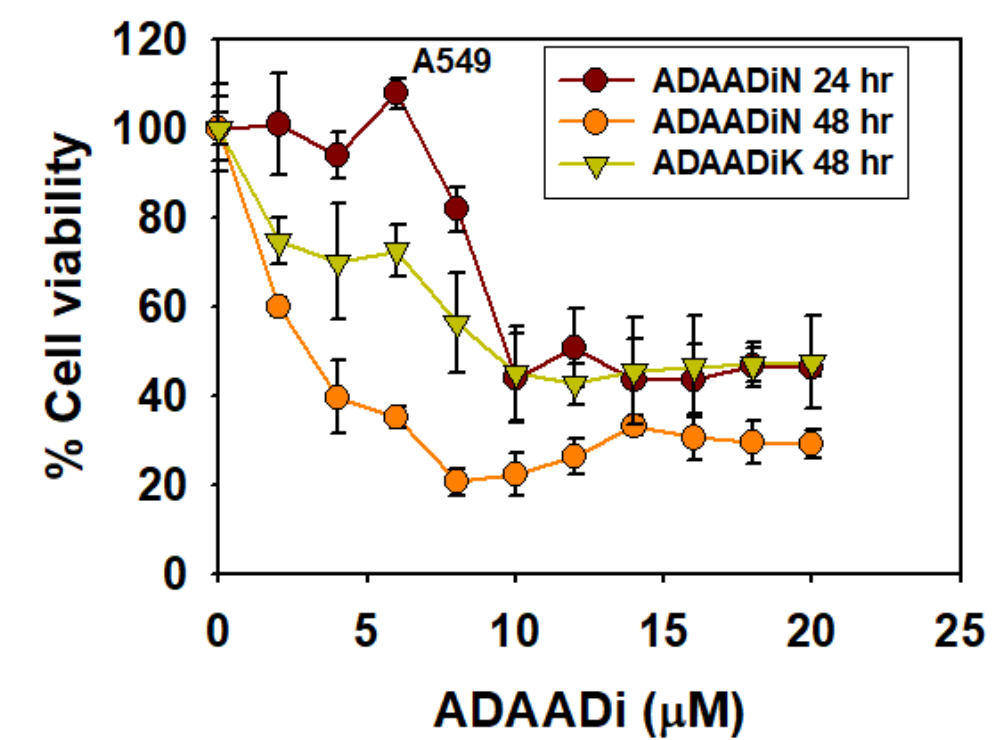

H.

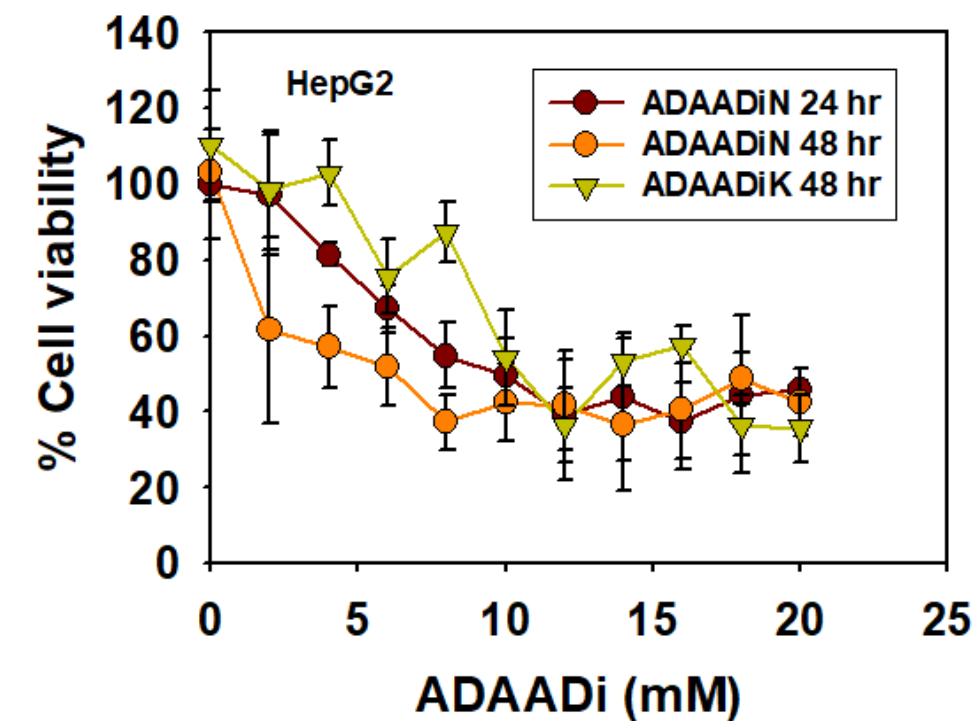

I.

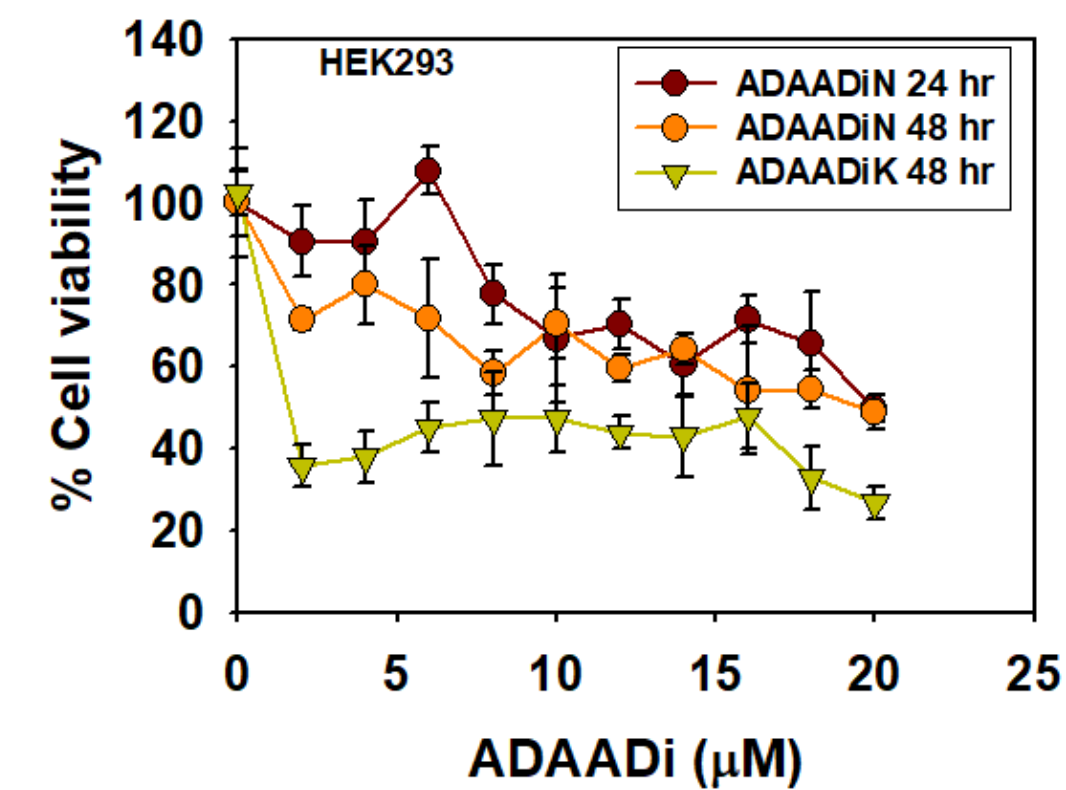

Supplement: pone.0251354.s001.pdf [file pone.0251354.s001.pdf]
