# Supplementary material for: Altering mammalian transcription networking with ADAADi: An inhibitor of ATP-dependent chromatin remodeling
Source: PubMed Central journal article supplement (PMC8128233; doi:10.1371/journal.pone.0251354), 2021-05-17

# S3 Fig

**A.**

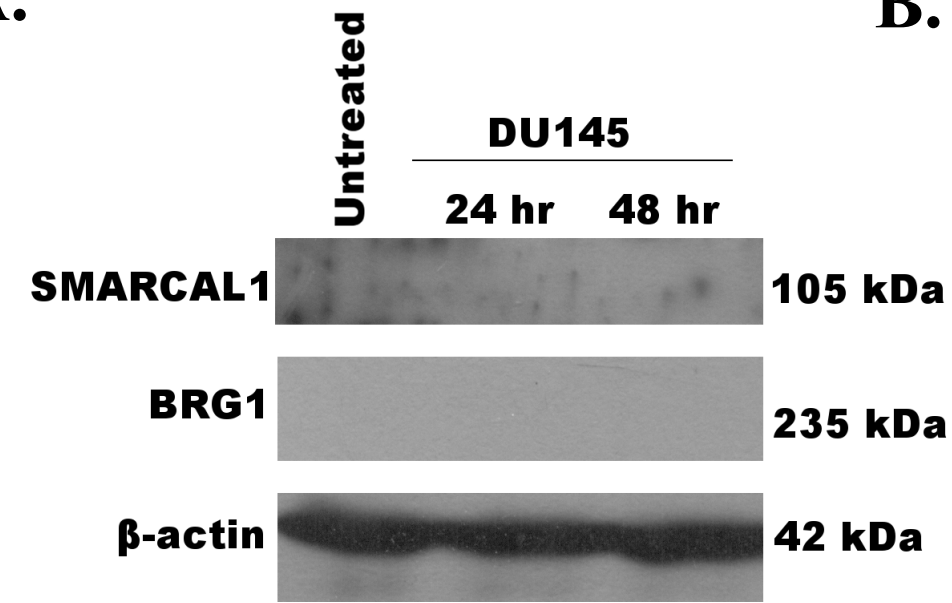

**B.**

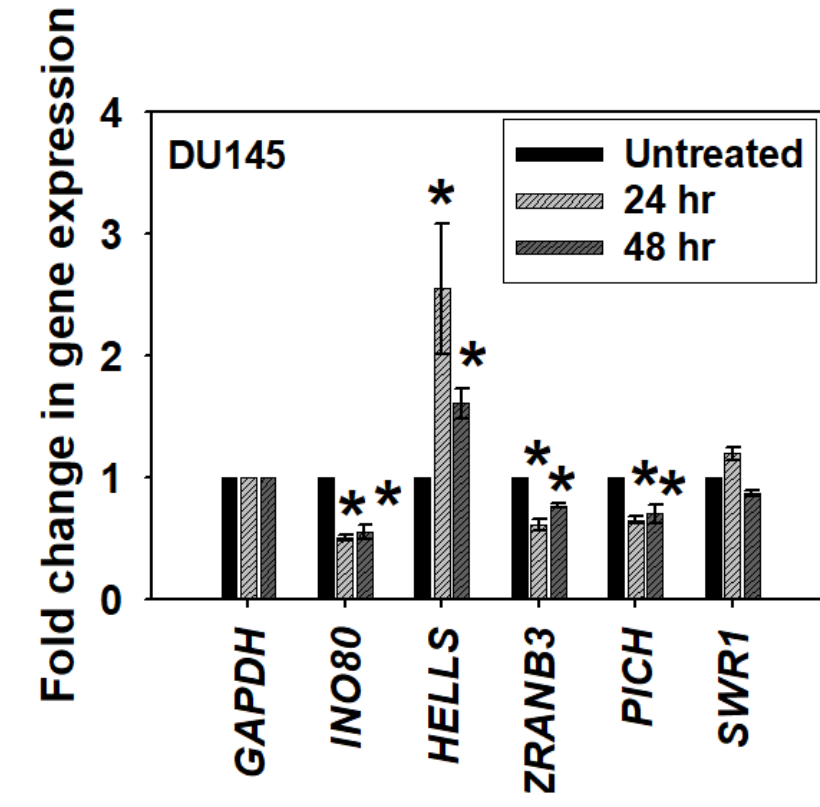

**C.**

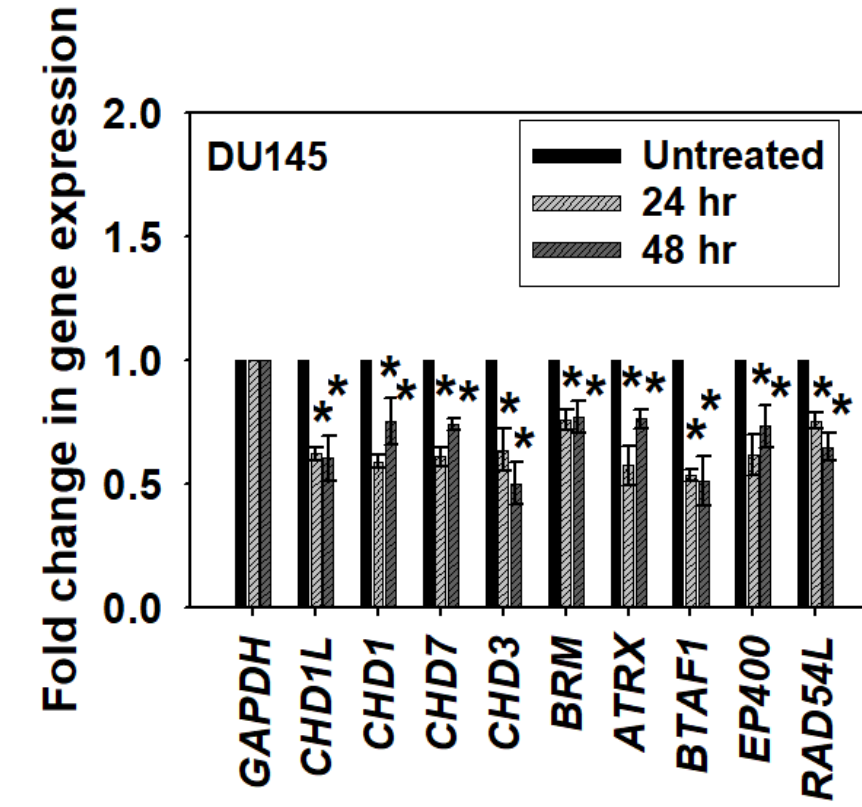

**D.**

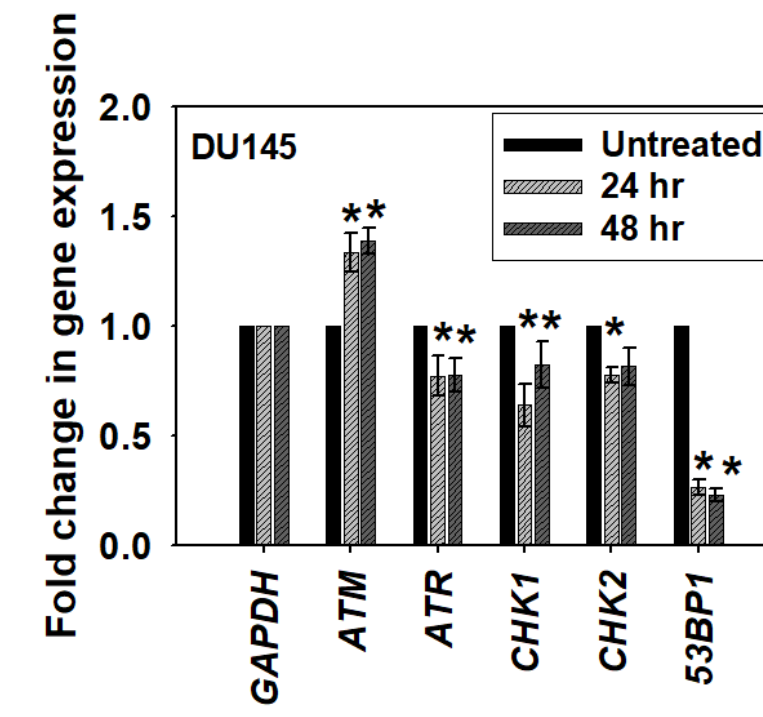

**E.**

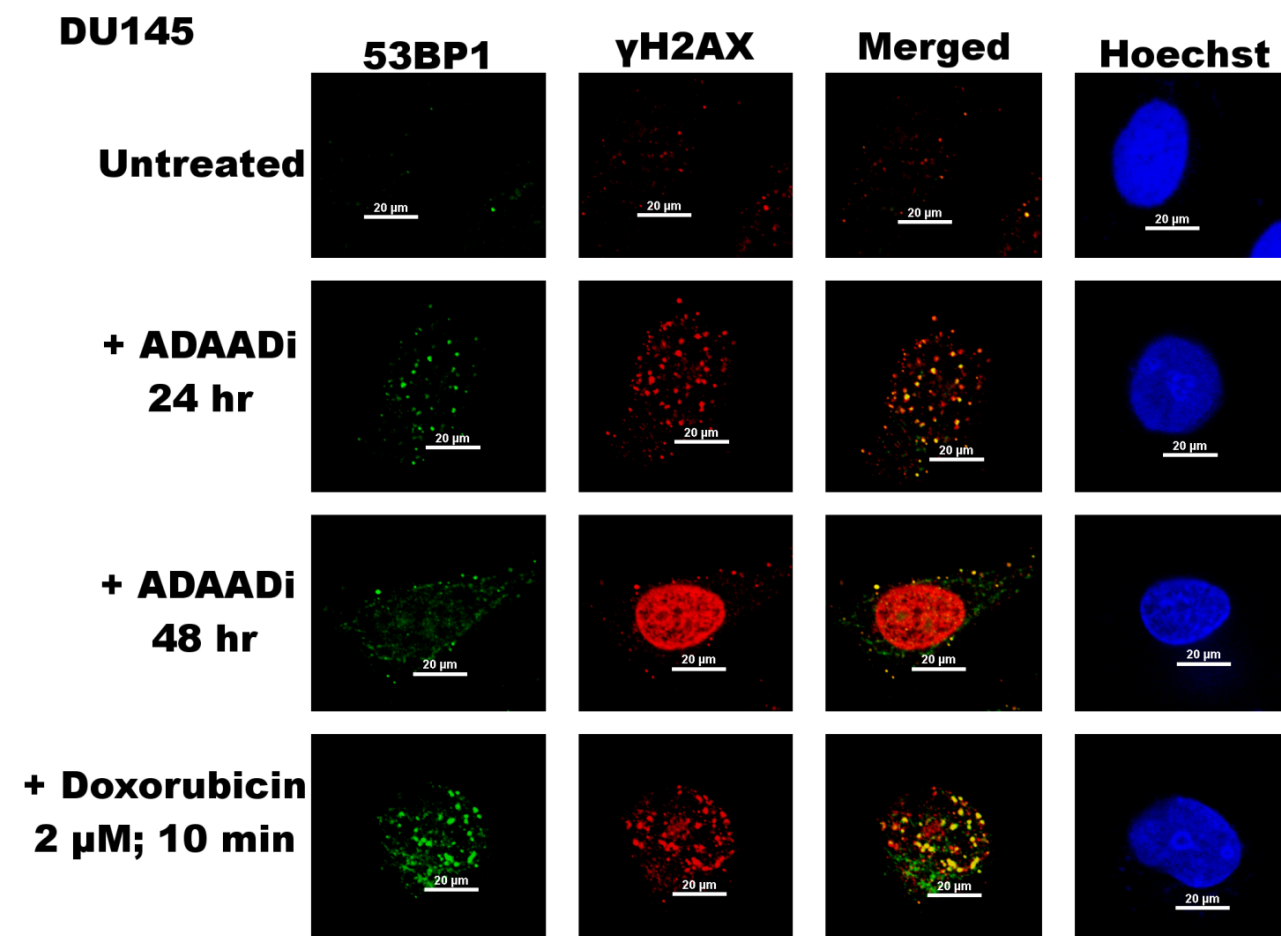

**F.**

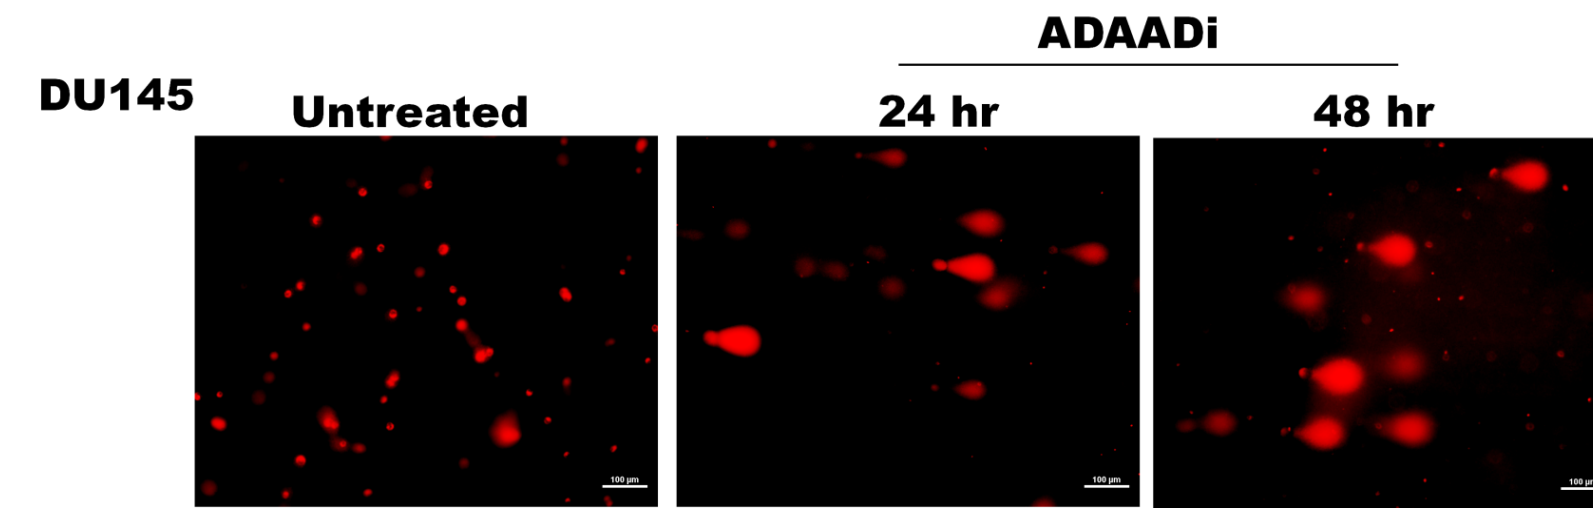

**G.**

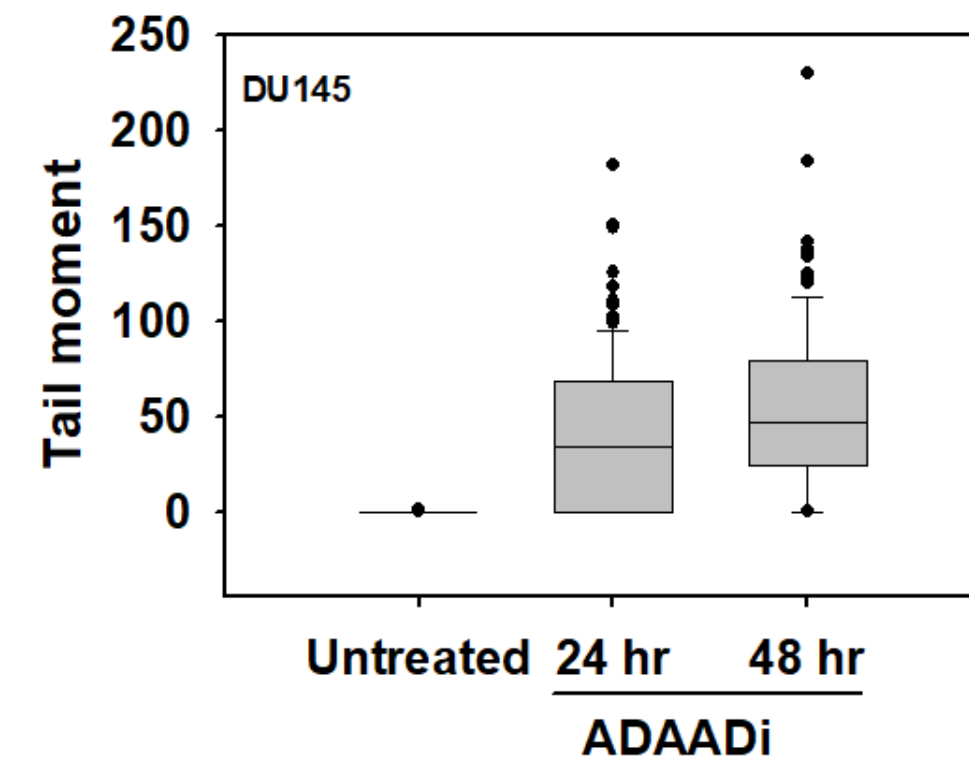

Supplement: pone.0251354.s003.pdf [file pone.0251354.s003.pdf]
