# Supplementary material for: Altering mammalian transcription networking with ADAADi: An inhibitor of ATP-dependent chromatin remodeling
Source: PubMed Central journal article supplement (PMC8128233; doi:10.1371/journal.pone.0251354), 2021-05-17

S8 Fig

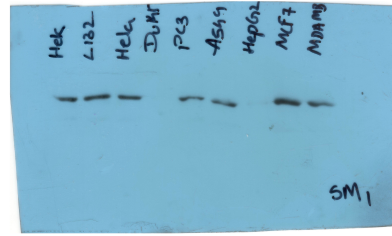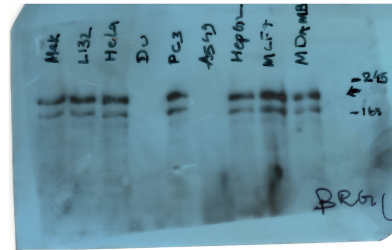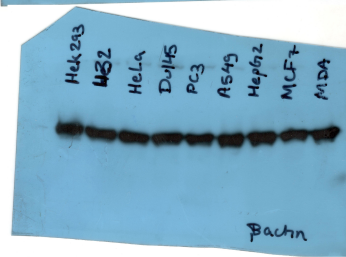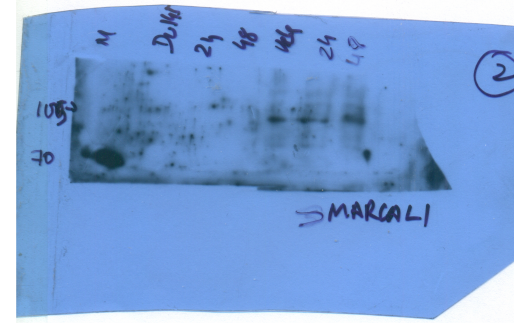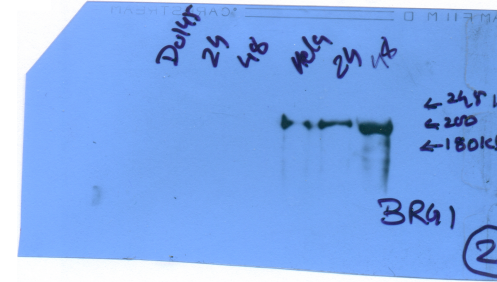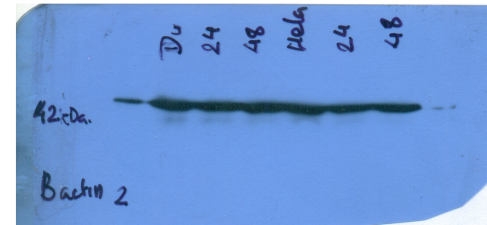

Marker Control 24 hr ADAADI 48 hr ADAADI

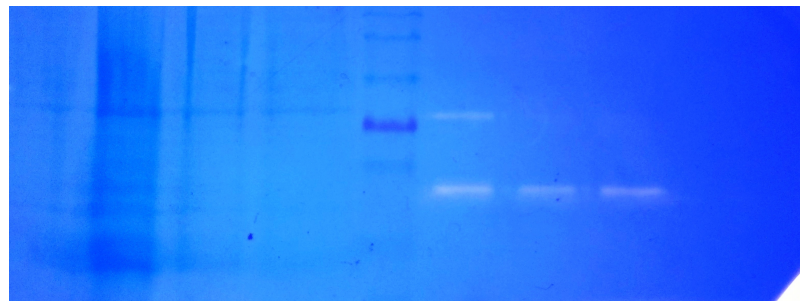

Control 24 hr ADAADI 48 hr ADAADI Marker

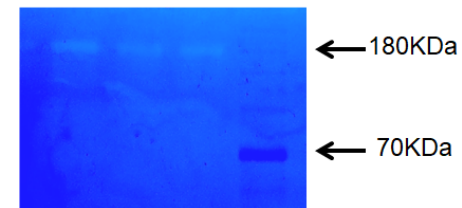

Supplement: pone.0251354.s008.pdf [file pone.0251354.s008.pdf]
